# Supplementary material
Source: HighWire-hosted journal article supplement (https://www.cmajopen.ca/highwire/filestream/85473/field_highwire_adjunct_files/3/2020-0188-4-at.pdf)
Supplement: 2020-0188-4-at.pdf [file 2020-0188-4-at.pdf]

Utility estimates for 10-year and Lifetime Models; values listed at age 45 (mean age at first cycle Markov model)

| Utility                                                | Value assigned | Plausible range | Distribution |
|--------------------------------------------------------|----------------|-----------------|--------------|
| Standard care<br>group no<br>comorbidity               | 0.694          | 0.308-1.00      | Beta         |
| Standard care<br>group diabetes                        | 0.642          | 0.376-1.00      | Beta         |
| Standard care<br>group<br>hypertension                 | 0.724          | 0.204-1.00      | Beta         |
| Standard care<br>group<br>Diabetes and<br>hypertension | 0.683          | 0.167-1.00      | Beta         |
| Medical Therapy<br>no comorbidity                      | 0.782          | 0.678-1.00      | Beta         |
| Medical Therapy<br>diabetes                            | 0.765          | 0.378-1.00      | Beta         |
| Medical Therapy<br>hypertension                        | 0.782          | 0.263-1.00      | Beta         |

|                                                     |       |              |      |
|-----------------------------------------------------|-------|--------------|------|
| Medical Therapy<br>Diabetes and<br>hypertension     | 0.765 | -0.0402-1.00 | Beta |
| Surgical<br>Therapy no<br>comorbidity               | 0.838 | 0.463-1.00   | Beta |
| Surgical<br>Therapy diabetes                        | 0.821 | 0.271-1.00   | Beta |
| Surgical<br>Therapy<br>hypertension                 | 0.838 | 0.271-1.00   | Beta |
| Surgical<br>Therapy<br>Diabetes and<br>hypertension | 0.821 | 0.204-1.00   | Beta |
| Death                                               | 0     | 0            | -    |
